# Supplementary material for: Phytochemical Characterization of Saudi Mint and Its Mediating Effect on the Production of Silver Nanoparticles and Its Antimicrobial and Antioxidant Activities
Source: MDPI journal article supplement (doi:10.3390/plants12112177), 2023-05-30
Supplement: s1 [file s1]

## Supplementary Materials

# Phytochemical Characterization of Saudi Mint and its Mediating Effect on the Production of Silver Nanoparticles and its Antimicrobial and Antioxidant Activities

Husam Qanash <sup>1,\*</sup>, Abdulrahman S. Bazaid <sup>1</sup>, Naif K. Binsaleh <sup>1</sup>, Bandar Alharbi <sup>1</sup>, Nawaf Alshammari <sup>2</sup>, Safa H. Qahl <sup>3</sup>, Hayaa M. Alhuthali <sup>4</sup> and Abdullatiff A. Bagher <sup>5</sup>

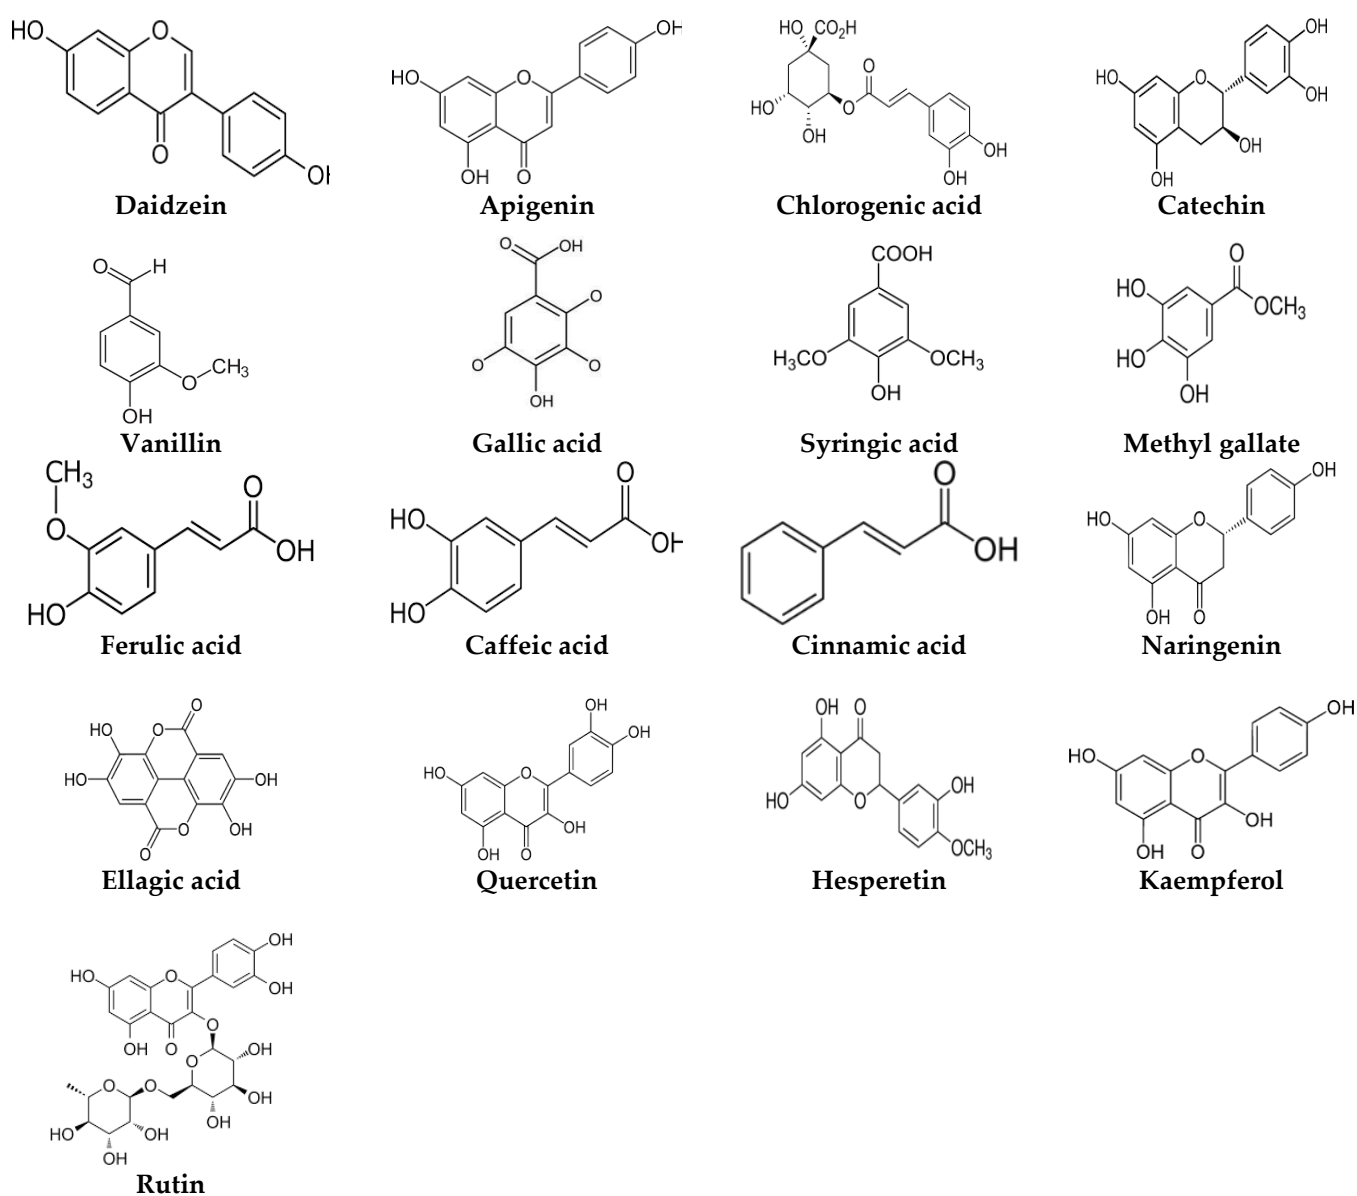

**Figure S1.** Chemical constructions of the identified phenolic and flavonoid in mint extract.
